# Supplementary material
Source: PubMed Central journal article supplement (PMC3233849)
Supplement: tables.pdf [file tables.pdf]

Table S1: Expression level of genes coding proteins associated with excitation contraction coupling and Ca<sup>2+</sup> Signaling and regulation. Genes showing significant change in their expression levels (+ / - 0.7 Log<sub>2</sub> ratio to control) are presented. AC-heat acclimated, EX-exercise training under normothermic conditions, EXAC-combined heat acclimation and exercise training.

| Gene Bank         | Swissprot                                         | Gene Name                                                                                                                                                                  | AC    | EX    | EXAC  |
|-------------------|---------------------------------------------------|----------------------------------------------------------------------------------------------------------------------------------------------------------------------------|-------|-------|-------|
| M26643            | P15390                                            | skeletal muscle sodium channel protein alpha subunit (SCN4A); MU-1                                                                                                         | 1.905 | 2.086 | 1.708 |
| M57682            | P27732;<br>Q63491;<br>Q62691;<br>Q01542<br>O09022 | voltage-dependent L-type calcium channel alpha 1D subunit (CACNA1D); L-type calcium channel alpha 1 polypeptide isoform 2 (CCHL1A2); rat brain class D (RBD); CACH3; CACN4 | 2.385 | 2.619 | 2.496 |
| M88751            | P54287                                            | voltage-gated dihydropyridine-sensitive L-type calcium channel beta 3 subunit (CCHB3)                                                                                      | 1.410 | 0.813 | 0.963 |
| U53420            | P70549                                            | sodium/calcium exchanger NCX3                                                                                                                                              | 2.657 | 1.108 | 1.917 |
| J03753            | P11505                                            | brain calcium-transporting plasma membrane type ATPase class 1 isoform (PMCA1AB); calcium pump                                                                             | 1.247 | 0.651 | 1.147 |
| J04629            | P13638                                            | sodium/potassium-transporting ATPase beta 2 subunit (ATP1B2)                                                                                                               | 1.143 | 0.981 | 0.986 |
| M30581;<br>J05086 | P18596                                            | calcium-transporting sarcoplasmic reticulum type ATPase class 3 isoform (SERCA3; ATP2A3); endoplasmic reticulum class 3 Ca <sup>++</sup> ATPase; calcium pump              | 1.136 | 1.224 | 1.439 |
| U02534            | Q62600                                            | nitric oxide synthase 3 (NOS3); endothelial NOS (ENOS)                                                                                                                     | 0.956 | 1.611 | 1.812 |
| M63837            | P20786                                            | platelet-derived growth factor receptor alpha (PDGFR-alpha; PDGFRA)                                                                                                        | 1.476 | 1.205 | 1.260 |
| D28498            | P53767                                            | vascular endothelial growth factor receptor 1 (VEGFR1); fms-related tyrosine kinase 1 (FLT1)                                                                               | 1.274 | 1.044 | 1.180 |
| M37394            | none                                              | epidermal growth factor receptor (EGF receptor; EGFR)                                                                                                                      | 1.582 | 1.723 | 1.324 |
| U69278            | O08680                                            | rat embryo tyrosine-protein kinase 4 (REK4); ephrin type A receptor 3 (EPHA3)                                                                                              | 1.411 | 1.326 | 1.240 |

|                  |                                         |                                                                                                                                                                                                          |       |       |       |
|------------------|-----------------------------------------|----------------------------------------------------------------------------------------------------------------------------------------------------------------------------------------------------------|-------|-------|-------|
| U21954           | P54759                                  | Ehk 3; ephrin type-A receptor 7; tyrosine kinase (Eph-related); EphA7                                                                                                                                    | 1.985 | 2.456 | 2.616 |
| M91590           | P29067                                  | beta-arrestin 2 (ARRB2)                                                                                                                                                                                  | 1.119 | 0.964 | 1.665 |
| X74227           | P42335                                  | inositol 1,4,5-triphosphate 3-kinase receptor 1                                                                                                                                                          | 1.618 | 1.902 | 2.050 |
| J04563           | P14646                                  | DPDE4; cAMP-dependent 3',5'-cyclic phosphodiesterase 4B                                                                                                                                                  | 0.780 | 1.284 | 0.963 |
| D84450           | Q63377                                  | Na,K-ATPase beta 3 subunit                                                                                                                                                                               | 1.284 | 1.176 |       |
| M18332           | P09217                                  | protein kinase C zeta (PKC-zeta; PKCZ)                                                                                                                                                                   | 0.755 | 0.801 |       |
| X68400           | Q64617                                  | PKC-eta; protein kinase C eta type                                                                                                                                                                       |       | 1.830 | 1.255 |
| M63334           | P13234                                  | calcium/calmodulin-dependent protein kinase type IV (CAMK IV; catalytic chain);CAM kinase-GR                                                                                                             |       | 1.640 | 0.773 |
| U34958           | P54311                                  | transducin beta-1 subunit; GTP-binding protein G(i)/G(s)/G(t) beta subunit 1                                                                                                                             |       | 0.779 | 1.749 |
| U27767           | P49799                                  | Rgs4; regulator of G-protein signaling 4 (RGP4)                                                                                                                                                          |       | 1.344 | 3.468 |
| U09457           | P14270                                  | cAMP-dependent 3',5'-cyclic phosphodiesterase 4D (PDE4D); DPDE3                                                                                                                                          |       | 1.891 | 2.870 |
| M80633           | P26770                                  | adenylyl cyclase 4                                                                                                                                                                                       |       | 1.893 | 1.874 |
| L11586           | Q64604                                  | leukocyte common antigen-related tyrosine phosphatase (LAR)                                                                                                                                              |       | 2.432 | 2.954 |
| M64373           | P54282;<br>Q01541                       | voltage-dependent P/Q-type calcium channel alpha-1A subunit (CACNA1A); L type calcium channel alpha-1 polypeptide isoform 4 (CACNL1A4; CACH4); brain calcium channel I; rat brain class A (RBA-1); CACN3 | 1.627 |       | 1.197 |
| M59786<br>M34364 | P22002<br>P27733;<br>Q62816;<br>Q63271; | voltage-dependent L-type calcium channel alpha 1C subunit (CACNA1); cardiac muscle L-type calcium channel alpha 1 polypeptide isoform 1 (CCHL1A1); rat brain class C (RBC); CACH2; CACN2                 | 1.283 |       | 0.749 |

|        |        |                                                                                                                                                                                                       |       |       |
|--------|--------|-------------------------------------------------------------------------------------------------------------------------------------------------------------------------------------------------------|-------|-------|
|        | Q64178 |                                                                                                                                                                                                       |       |       |
| M91589 | P29066 | beta-arrestin 1 (ARRB1)                                                                                                                                                                               | 1.307 | 1.772 |
| U13396 | Q62689 | Janus tyrosine-protein kinase 2 (JAK2)                                                                                                                                                                | 2.714 | 5.990 |
| L35771 | P48548 | G protein-activated inward rectifier potassium channel 4 (GIRK4); inward rectifier potassium channel subfamily J member 5 (KCNJ5); heart KATP channel; KATP-1; cardiac inward rectifier (CIR); KIR3.4 | 1.38  |       |
| M92905 | Q02294 | calcium channel, alpha 1 beta                                                                                                                                                                         | 0.921 |       |
| J03754 | P11506 | sodium/potassium-transporting ATPase isoform 2 beta polypeptide 2 (Na <sup>+</sup> /K <sup>+</sup> ATPase 2 beta 2; ATP2B2)                                                                           | 1.039 |       |
| X02341 | P01283 | vasoactive intestinal peptide                                                                                                                                                                         | 1.033 |       |
| V01228 | P01257 | calcitonin                                                                                                                                                                                            | 1.168 |       |
| M26744 | P20607 | interleukin 6 (IL6)                                                                                                                                                                                   | 1.617 |       |
| M31837 | P15473 | insulin-like growth factor binding protein 3 (IGF-binding protein 3; IGFBP3)                                                                                                                          | 0.854 |       |
| J04022 | P11507 | calcium-transporting sarcoplasmic reticulum type ATPase class 2 isoform (SERCA2; ATP2A2); endoplasmic reticulum class 2 Ca <sup>++</sup> ATPase; calcium pump                                         |       | 0.716 |
| L26986 | P40146 | adenylyl cyclase type VIII (ADCY8); ATP pyrophosphate lyase; Ca <sup>2+</sup> /calmodulin-activated adenylyl cyclase                                                                                  |       | 2.183 |
| X61394 | P54283 | calcium channel, beta subunit, brain                                                                                                                                                                  |       | 4.237 |
| M18330 | P09215 | protein kinase C delta type (PKC-delta; PRKCD; PKCD)                                                                                                                                                  |       | 2.166 |
| X07320 | P13286 | phosphorylase B kinase gamma subunit                                                                                                                                                                  |       | 4.884 |
| M16112 | P08413 | calcium/calmodulin-dependent protein kinase type II beta subunit (CAM-kinase II beta; CAMK-II beta)                                                                                                   |       | 1.748 |
| L23219 | P43425 | GTP-binding protein G(i)/G(s)/G(o) gamma 7 subunit (GNG7; GNGT7)                                                                                                                                      |       | 2.683 |

|        |        |                                                            |  |  |       |
|--------|--------|------------------------------------------------------------|--|--|-------|
| J03806 | P10686 | phospholipase C gamma 1 (PLC-gamma 1; PLCG1)               |  |  | 2.365 |
| M99567 | none   | phospholipase C beta 3 (PLC-beta 3; PLCB3)                 |  |  | 2.560 |
| M80550 | P26769 | adenylyl cyclase type II                                   |  |  | 2.485 |
| M55075 | P21932 | adenylyl cyclase (olfactive type) type III                 |  |  | 2.411 |
| M96159 | Q04400 | Adenylyl cyclase type V                                    |  |  | 1.225 |
| M64092 | P27775 | cAMP-dependent protein kinase inhibitor 2 (PKI-beta; PKIB) |  |  | 2.487 |

Table S2: Expression level of genes associated with carbohydrates and lipids metabolic pathways. Genes showing significant change in their expression levels (+ / - 0.7 Log<sub>2</sub> ratio to control) are presented. AC-heat acclimated, EX-exercise training under normothermic conditions, EXAC-combined heat acclimation and exercise training.

| Sub category | Gene bank | Swissprot         | Protein/gene                                                              | AC    | EX    | EXAC  |
|--------------|-----------|-------------------|---------------------------------------------------------------------------|-------|-------|-------|
| Carbohydrate | X15546    | P23739            | Sucrase isomaltase                                                        | 1.076 | 0.735 | 0.926 |
| Carbohydrate | M86240    | P19112;<br>Q64594 | Fructose-16-bisphosphatase, liver                                         | 0.772 | 1.012 | 0.913 |
| Carbohydrate | M64797    | P25114            | Testis fructose-6-phosphate 2-kinase/fructose 2,6-biphosphate             | 0.809 |       | 0.797 |
| Carbohydrate | L26010    | Q10984            | Galactoside 2-L- fucosyltransferase 2                                     | 0.781 | 0.817 |       |
| Carbohydrate | M10149    | P00884;<br>P70706 | Fructose-bisphosphate aldolase B                                          |       | 0.810 |       |
| Carbohydrate | M12919    | P05065            | Fructose-bisphosphate aldolase A                                          |       | 0.740 |       |
| Carbohydrate | U25651    | P47858            | Muscle 6-phosphofructokinase (PFKM)                                       |       | 0.701 |       |
| Carbohydrate | X07467    | P05370            | Glucose-6-phosphate dehydrogenase                                         |       |       | 0.772 |
| Carbohydrate | M17701    | P04797;<br>P09328 | Glyceraldehyde 3-phosphate dehydrogenase (GAPDH)                          |       |       | 0.834 |
| Lipids       | L09216    | P54318            | pancreatic lipase related protein 2 precursor; secretory glycoprotein GP- | 1.070 | 0.942 | 0.757 |
| Lipids       | L26043    | P43884            | perilipin A/B (PERIA/PERIB); lipid droplet-associated proteins A/B        | 1.074 | 1.038 | 0.881 |
| Lipids       | U07683    | Q09426            | 2-hydroxyacylsphingosine 1-beta-galactosyltransferase precursor           | 2.006 | 1.494 | 1.362 |
| Lipids       | M73714    | P30839            | aldehyde dehydrogenase 3, microsomal                                      | 1.164 | 1.808 | 1.738 |

|        |        |                              |                                                                                           |       |       |       |
|--------|--------|------------------------------|-------------------------------------------------------------------------------------------|-------|-------|-------|
| Lipids | U17901 | P54319                       | phospholipase A-2-activating protein (PLAP)                                               | 1.515 | 2.541 | 2.311 |
| Lipids | M19967 | P07150;<br>Q64664            | annexin I (ANX1) phospholipase A2 inhibitory protein                                      | 1.158 | 0.814 |       |
| Lipids | U90556 | O08564                       | phosphatidate phosphohydrolase type 2                                                     |       | 1.175 | 0.982 |
| Lipids | M95591 | Q02769                       | squalene synthetase, hepatic                                                              |       | 1.283 | 1.198 |
| Lipids | M38178 | P22071                       | Hydroxy-delta-5-steroid dehydrogenase, 3 beta- and steroid delta-isomerase                |       | 3.176 | 2.289 |
| Lipids | U03763 | P51433                       | calcium-dependent phospholipase A2 precursor (PLA2)                                       |       | 0.786 | 0.929 |
| Lipids | J05030 | P15651                       | short chain acyl-CoA dehydrogenase precursor (SCAD; ACADS)                                | 0.710 | 0.782 |       |
| Lipids | M34728 | P11915;<br>Q63383            | nonspecific lipid-transfer protein precursor (NSL-TP);                                    |       | 0.745 |       |
| Lipids | D90109 | P18163                       | long chain acyl-CoA synthetase 2 (LACS2); liver long chain fatty acid-CoA ligase (FACL2)  |       | 0.840 |       |
| Lipids | D88890 | Q64559;<br>O09041;<br>O08652 | cytosolic acyl-CoA thioester hydrolase (ACT); long chain acyl-CoA hydrolase (LACH1; ACH1) |       | 0.751 |       |
| Lipids | D37920 | P52020                       | squalene monooxygenase; squalene epoxidase (SQLE; SE); ERG1                               |       | 1.099 |       |
| Lipids | D63885 | P70470                       | lysophospholipase                                                                         |       | 0.951 |       |
| Lipid  | L22294 | Q63065                       | Pyruvate dehydrogenase kinase kinase                                                      |       | 0.887 |       |
| Lipids | U07798 | P39878                       | phospholipase A2, group IIC                                                               |       | 2.467 |       |
| Lipids | U76205 | P97943                       | CD36 antigen                                                                              |       |       | 1.446 |
| Lipids | U38376 | P50393                       | phospholipase A2, group IVA (cytosolic, calcium-dependent)                                |       |       | 1.239 |
| Lipids | U11760 | P46462                       | ATPase, transitional endoplasmic reticulum                                                |       |       | 0.749 |

|        |        |        |                                                                       |  |  |       |
|--------|--------|--------|-----------------------------------------------------------------------|--|--|-------|
| Lipids | U89529 | P97849 | fatty acid transport protein                                          |  |  | 1.670 |
| Lipids | M16235 | P07867 | triacylglycerol lipase precursor (hepatic)                            |  |  | 1.354 |
| Lipids | D10041 | P33124 | brain long-chain fatty acid-CoA ligase (LACS);<br>acyl-CoA synthetase |  |  | 0.994 |
| Lipids | U62803 | O35849 | 11-beta-hydroxysteroid dehydrogenase                                  |  |  | 1.944 |
| Lipids | S81448 | P24008 | 3-oxo-5-alpha-steroid 4-dehydrogenase 1<br>(SRD5A1);                  |  |  | 0.740 |

Table S3: Expression level of genes associated with stress and cytoprotection. Genes showing significant change in their expression levels (+ / - 0.7 Log<sub>2</sub> ratio to control) are presented.

| Subcategory   | Gene bank | Swissprot                            | Protein/gene                                                                                                                                        | AC    | EX    | EXAC  |
|---------------|-----------|--------------------------------------|-----------------------------------------------------------------------------------------------------------------------------------------------------|-------|-------|-------|
| MAPKs         | U37462    | Q62862;<br>Q62863;<br>Q62864         | MAP kinase kinase 5                                                                                                                                 | 2.473 | 2.277 | 2.493 |
| MAPKs         | L27112    | P49186                               | c-Jun N-terminal kinase 2 (JNK2);                                                                                                                   |       | 1.842 | 1.533 |
| MAPKs         | Z16415    | Q01986                               | MAP kinase kinase 1; MAPKK1                                                                                                                         | 1.197 |       |       |
| MAPKs         | D14592    | P36506                               | MAP kinase kinase 2; MAPKK2                                                                                                                         | 1.222 |       |       |
| Pro Apoptotic | D00680    | P23764                               | plasma glutathione peroxidase (GSHPX-P; GPX3); selenoprotein                                                                                        | 2.073 | 1.755 | 1.769 |
| Pro Apoptotic | AF003523  | O35147                               | BCL2-associated death promoter (BAD)                                                                                                                | 0.811 | 1.695 | 1.216 |
| Pro Apoptotic | U49729    | Q63690<br>Q62995<br>Q64383           | BCL2-associated X protein membrane isoform alpha (BAX-alpha)                                                                                        | 1.194 | 1.397 | 1.088 |
| Pro Apoptotic | D83697    | P70678                               | activator of apoptosis harakiri (HRK); neuronal death protein 5 (DP5); BID3                                                                         | 1.702 | 1.204 | 1.821 |
| Pro Apoptotic | X80477    | P47824                               | P2X purinoceptor 1 (P2RX1; P2X1); ATP receptor; RP-2 protein                                                                                        | 2.727 | 1.213 | 2.490 |
| Pro Apoptotic | X05137    | P07174                               | low-affinity nerve growth factor receptor (NGF receptor; NGFR)                                                                                      | 2.312 | 1.715 | 1.707 |
| Pro Apoptotic | U49930    | P55213<br>P70543<br>Q62993<br>P97699 | caspase 3 (CASP3); apopain; cysteine protease CPP32; YAMA protein; SREBP cleavage activity 1 (SCA1); IL1-beta-converting enzyme-like protein (LICE) | .     | 3.068 | 4.343 |
| Pro Apoptotic | X13058    | P10361                               | cellular tumor antigen p53 (TP53)                                                                                                                   | 1.026 |       | 1.535 |



|                |        |                                      |                                                                                                                          |       |       |       |
|----------------|--------|--------------------------------------|--------------------------------------------------------------------------------------------------------------------------|-------|-------|-------|
| Pro Apoptotic  | M63122 | P22934                               | tumor necrosis factor receptor 1 (TNFR1)                                                                                 | 0.870 |       |       |
| Pro Apoptotic  | U03470 | P36940                               | fas antigen ligand (FASL); apoptosis antigen ligand (APTL; APT1LG1); tumor necrosis factor superfamily member 6 (TNFSF6) | .     | 1.869 |       |
| Anti Apoptotic | Z27118 | Q63718                               | heat shock 70-kDa protein (HSP70)                                                                                        | 1.151 | 1.702 | 0.959 |
| Anti Apoptotic | U72350 | P53563<br>Q62678<br>P70613<br>P70614 | BCL2-like protein 1 (BCL2L1); BCLX                                                                                       | 1.161 | 1.211 | 1.395 |
| Anti Apoptotic | D83697 | P70678                               | activator of apoptosis harakiri (HRK); neuronal death protein 5 (DP5); BID3                                              | 1.702 | 1.204 | 1.821 |
| Anti Apoptotic | U62326 | P30904                               | macrophage migration inhibitory factor (MIF); glutathione-binding 13-kDa protein                                         |       | 0.880 | 0.892 |
| Anti Apoptotic | U06099 | P35704                               | thioredoxin peroxidase 1 (TDPX1); thioredoxin-dependent peroxide reductase 1; thiol-specific antioxidant protein (TSA)   | 1.914 |       |       |
| Oxidation      | Z27118 | Q63718                               | heat shock 70-kDa protein (HSP70)                                                                                        | 1.151 | 1.702 | 0.96  |
| Oxidation      | D00680 | P23764                               | plasma glutathione peroxidase (GSHPX-P; GPX3); selenoprotein                                                             | 2.073 | 1.754 | 1.768 |
| Oxidation      | M18335 | P05179                               | cytochrome P450 2C7 (CYP2C7); P450F; PTF1                                                                                | 2.703 | 1.862 | 2.134 |
| Oxidation      | M33936 | P20817                               | cytochrome P450 4A3 (CYP4A3); lauric acid omega-hydroxylase; P450-LA-omega 3                                             | 2.773 | 2.208 | 2.95  |
| Oxidation      | M37828 | P24464                               | cytochrome P450 IVA8 (CYP4A8); P450-KP1; P450-PP1                                                                        | 1.707 | 1.618 | 1.603 |
| Oxidation      | U73174 | P70619                               | glutathione reductase (GRase; GSR; GR)                                                                                   | 1.428 | 1.476 | 1.066 |
| Oxidation      | X00469 | P00185                               | cytochrome P450 IA1 (CYPIA1); 3-methylcholanthrene-inducible cytochrome P450 (P450MC)                                    | 2.254 | 2.196 |       |
| Oxidation      | J02627 | P05182                               | cytochrome P450 2E1 (CYP2E1); P450-J; P450RLM6                                                                           | 1.496 | 1.228 |       |
| Oxidation      | J02852 | P20812                               | cytochrome P450 2A3 (CYP2A3); coumarin 7-hydroxylase                                                                     | 3.4   | 3.393 |       |
| Oxidation      | M94548 | P33274                               | cytochrome P450 IVF1 (CYP4F1); P450-A3                                                                                   | 1.09  | 1.013 |       |
| Oxidation      | U39206 | P51869                               | cytochrome P-450 4F4                                                                                                     | 0.939 | 1.062 |       |

|           |        |                              |                                                                                                                   |       |        |       |
|-----------|--------|------------------------------|-------------------------------------------------------------------------------------------------------------------|-------|--------|-------|
| Oxidation | U39207 | P51870                       | cytochrome P450 4F5                                                                                               | 1.965 | 1.297  |       |
| Oxidation | J02669 | P11711                       | cytochrome P450 IIA1 (CYP2A1); 3-methylcholanthrene-inducible cytochrome P450; testosterone 7-alpha-hydroxylase   | 3.043 | 1.791  |       |
| Oxidation | M29853 | P15129                       | cytochrome P450 4B1 (CYP4B1); P450-isozyme 5                                                                      |       | 0.8747 | 1.129 |
| Oxidation | J02657 | P08683<br>Q63141<br>Q64554   | cytochrome P450 IIC11 (CYP2C11); P450(M-1); P450H; P450-UT-A; UT2                                                 |       | 2.41   | 1.738 |
| Oxidation | M58041 | P19225                       | cytochrome P450 IIC22 (CYP2C22); P450 MD; P450 P49                                                                |       | 2.720  | 2.522 |
| Oxidation | X67654 | Q01579                       | glutathione S-transferase subunit 5 theta (GST5-5)                                                                | 1.857 |        | 1.662 |
| Oxidation | X02904 | P04906                       | glutathione S-transferase P subunit; GST subunit 7 pi (GST7-7)                                                    | 0.911 |        | 0.796 |
| Oxidation | J05460 | P18125<br>P51543             | cytochrome P450 VII (CYP7); cholesterol 7-alpha-monooxygenase; cholesterol 7-alpha-hydroxylase                    | 2.502 |        | 2.945 |
| Oxidation | U17697 | Q64654<br>Q64549             | cytochrome P450 51 (CYP51); CYPL1; P450-14 DM; sterol 14-alpha demethylase; lanosterol 14-alpha demethylase (LDM) | 0.955 |        | 1.266 |
| Oxidation | U09540 | Q64678                       | P450 IB1 (CYP1B1); C3H cytochrome P450                                                                            | 0.992 |        |       |
| Oxidation | J05460 | P18125;<br>P51543            | cytochrome P450 VII (CYP7);                                                                                       | 2.502 |        |       |
| Oxidation | M10161 | P04800<br>Q64580             | cytochrome P450 IIIA1 (CYP3A1); P450-PCN1                                                                         |       | 1.36   |       |
| Oxidation | U60085 | P51538<br>Q64631<br>Q64557   | olfactory cytochrome P450 IIIA9 (CYP3A9)                                                                          |       | 0.811  |       |
| Oxidation | X15030 | P11240                       | cytochrome c oxidase, subunit Va, mitochondrial                                                                   |       | 0.809  |       |
| Oxidation | U39943 | P51590                       | cytochrome P-450 2J3                                                                                              |       | 2.077  |       |
| Oxidation | U60085 | P51538;<br>Q64631;<br>Q64557 | cytochrome P-450 3A9, olfactory                                                                                   |       | 0.811  |       |
| Oxidation | S79304 | P05503                       | cytochrome oxidase, subunit I                                                                                     |       |        | 0.763 |
